# Supplementary material for: Optimized coaxial focused electrohydrodynamic jet printing of highly ordered semiconductor sub-microwire arrays for high-performance organic field-effect transistors
Source: Royal Society of Chemistry journal article supplement (doi:10.1039/d2nr06469c), 2022-12-21
Supplement: d2nr06469c2.pdf [file d2nr06469c2.pdf]

## Supporting Information

### **Optimized Coaxial Focused Electrohydrodynamic Jet Printing of Highly Ordered Semiconductor Sub-Microwire Arrays for High-Performance Organic Field-Effect Transistors**

Liangkun Lu<sup>a</sup>, Dazhi Wang<sup>a,c,d\*</sup>, Zhiyuan Zhao<sup>b</sup>, Yikang Li<sup>a</sup>, Changchang Pu<sup>a</sup>, Pengfei Xu<sup>a</sup>, Xiangji Chen<sup>a</sup>, Chang Liu<sup>a</sup>, Shiwen Liang<sup>d</sup>, Liujia Suo<sup>a</sup>, Junsheng Liang<sup>a</sup>, Yan Cui<sup>a</sup>, Yunlong Guo<sup>b</sup>, Yunqi Liu<sup>b</sup>

<sup>a</sup>Laboratory for Micro/Nano Technology and System of Liaoning Province, Dalian University of Technology, Dalian, 116024, China.

<sup>b</sup>Beijing National Laboratory for Molecular Sciences, Key Laboratory of Organic Solids, Institute of Chemistry, Chinese Academy of Sciences, Beijing, 100190, China

<sup>c</sup>Key Laboratory for Precision and Non-traditional Machining Technology of Ministry of Education, Dalian University of Technology, Dalian, 116024, China.

<sup>d</sup>Ningbo Institute of Dalian University of Technology, Ningbo, 315000, China.

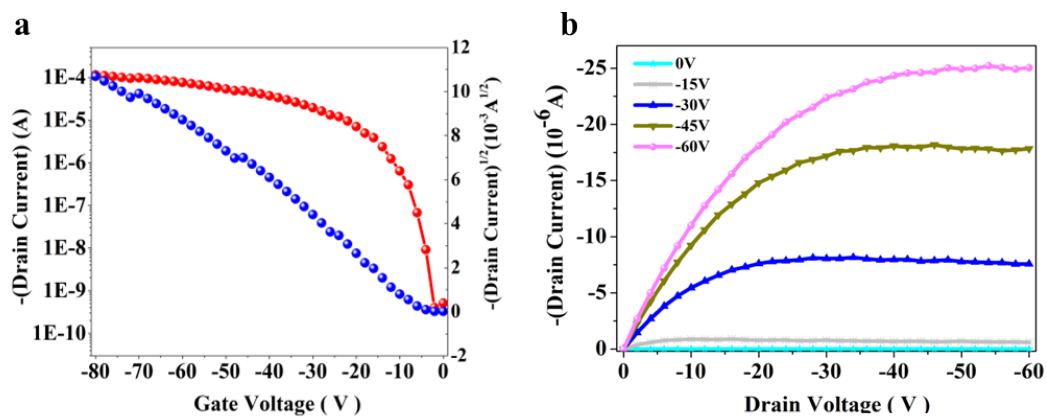

**Figure S1** a-b) Transfer and Output characteristic of the IDTBT thin film based OFETs.

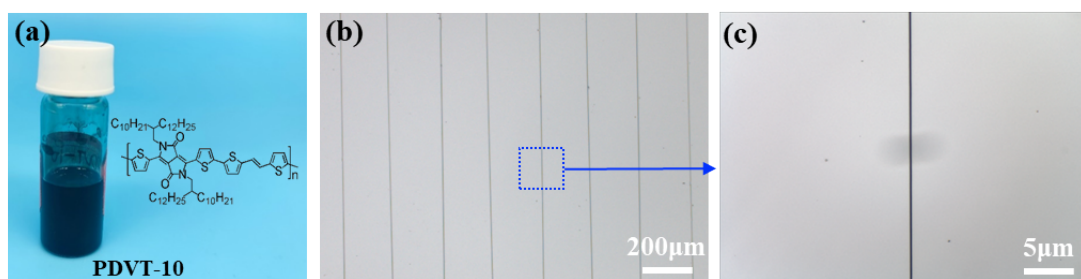

**Figure S2** a) Solution of PDVT-10 ink. b-c) Linear array structures of PDVT-10 polymer, which removed silicon oil.
